# Supplementary material for: Modular functionalization and hydrogel formation via red-shifted and self-reporting [2+2] cycloadditions
Source: Royal Society of Chemistry journal article supplement (doi:10.1039/d0cc07429b), 2020-12-17
Supplement: d0cc07429b1.pdf [file d0cc07429b1.pdf]

## Electronic Supplementary Information

### Modular functionalization and hydrogel formation *via* red-shifted and self-reporting [2+2] cycloadditions

Simon Ludwanowski,<sup>\*b-d</sup> Daniel Hoenders,<sup>a-d</sup> Kubra Kalayci,<sup>f,g</sup> Hendrik Frisch,<sup>f,g</sup> Christopher Barner-Kowollik,<sup>f,g</sup>  
Andreas Walther<sup>\*a-e</sup>

---

<sup>a</sup>A<sup>3</sup>BMS Lab, Department of Chemistry, University of Mainz, Duesbergweg 10-14, 55128 Mainz, Germany.

<sup>b</sup>Institute for Macromolecular Chemistry, University of Freiburg, Stefan-Meier-Straße 31, 79104 Freiburg, Germany.

<sup>c</sup>Freiburg Materials Research Center (FMF), University of Freiburg, Stefan-Meier-Straße 21, 79104 Freiburg, Germany.

<sup>d</sup>Freiburg Center for Interactive Materials and Bioinspired Technologies (FIT), University of Freiburg, Georges-Köhler-Allee 105, 79110 Freiburg, Germany.

<sup>e</sup>Cluster of Excellence livMatS @ FIT – Freiburg Center for Interactive Materials and Bioinspired Technologies, University of Freiburg, Georges-Köhler-Allee 105, D-79110 Freiburg, Germany

<sup>f</sup>Centre for Materials Science, Queensland University of Technology (QUT), 2 George Street, Brisbane, QLD 4000, Australia.

<sup>g</sup>School of Chemistry and Physics, Queensland University of Technology (QUT), 2 George Street, Brisbane, QLD 4000, Australia.

\*Corresponding authors. Email: andreas.walther@uni-mainz.de, simon.ludwanowski@makro.uni-freiburg.de

## Materials

All chemicals were used without further purification: 1,6-Dibromopyrene (Synthonix, 98.0 %), copper iodide (Merck, for synthesis), sodium ascorbate (Sigma Aldrich, >99.0 %), *N,N'*-dimethyl-ethylenediamine (DMEDA, Alfa Aesar, 95.0 %), sodium azide (Abcr, >99.5 %), sodium hydrosulfide hydrate (Sigma Aldrich), potassium carbonate (Abcr, 99.0 %), iodomethane (Abcr, 99.5 %), palladium(II) acetate (Sigma Aldrich, 97.0 %), triphenylphosphine (Roth, >99.5 %), pentafluorostyrene (Abcr, 98 %), methyl trifluoromethanesulfonate (MeOTf, Sigma Aldrich, >98 %), 1,8-diazabicyclo(5.4.0)undec-7-ene (DBU, TCI, >98.0 %), polyethylene glycol methyl ether thiol (*m*PEG<sub>44</sub>-SH,  $M_n = 2,000 \text{ g}\cdot\text{mol}^{-1}$ ), 4arm-polyethylene glycol thiol (sPEG-SH, pentaerythritol core, 20 kDa, JenKem USA, >96 %).

## Instrumentation

### NMR spectroscopy

NMR measurements were conducted on 400 MHz (9.3 T) Bruker Ascent 400 spectrometer. Coupling constants  $J$  and chemical shifts  $\delta$  are displayed in Hz and in ppm, respectively. The signals of deuterated solvents were used as internal standards.

### Liquid chromatography mass spectrometry (LC-MS)

LC-MS measurements were performed on an UltiMate 3000 UHPLC System (Dionex, Sunnyvale, CA, USA) consisting of a pump (LPG 3400SZ), autosampler (WPS 3000TSL) and a temperature-controlled column compartment (TCC 3000). Separation was performed on a C18 HPLC column (Phenomenex Luna 5  $\mu\text{m}$ , 100  $\text{\AA}$ , 250  $\times$  2.0 mm) operating at 40 °C with water/acetonitrile as eluents. The flow was split in a 9:1 ratio, where 90 % of the eluent was directed through a DAD UV-detector (VWD 3400, Dionex) and 10 % was infused into the electrospray source. Spectra were recorded on an LTQ Orbitrap Elite mass spectrometer (Thermo Fisher Scientific, San Jose, CA, USA) equipped with a HESI II probe. The instrument was calibrated in the  $m/z$  range 74-1822 using premixed calibration solutions (Thermo Scientific).

### UV/Vis and fluorescence spectroscopy

UV/Vis and fluorescence measurements were carried out on an QE Pro from Ocean Insight equipped with the light source DH-2000-BAL and the temperature-controlled cuvette holder qpod 2e<sup>TM</sup> from Quantum Northwest for fiber optic spectroscopy, which enables to successively record UV/Vis spectra in 180° and fluorescence spectra in 90° (Figure S10). Time-resolved measurements were acquired using self-written MatLab scripts.

### Tunable Opotek Laser

Laser experiments were conducted using a tunable Coherent Opolette 355 laser from Opotek operated at 410-480 nm with a full width half maximum of 7 ns and a repetition rate of 20 Hz. The emitted pulse, which has a flat-top spatial profile, was expanded to 6 mm diameter using focusing lenses and directed upwards using a prism. The beam was then centered on a glass laser vial which is positioned in a 6 mm diameter slot in a temperature-controlled sample holder. The energy transmitted through the sample holder was measured using a Coherent Energy Max PC power meter.

## Ocean Insight LED

Samples were irradiated with a fiber-coupled LED from Ocean Insight (470 nm:  $465 \pm 10$  nm,  $33.0 \text{ mW}\cdot\text{cm}^{-2}$ ).

## pH measurements

pH measurements were carried out on a 907 Titrando from Metrohm.

## Rheology

The hydrogels prepared from sPEG-qStyPy (7.0 wt%, dissolved in 1.0 mM phosphate buffer, pH 7.4) were characterized *via* rheology using an Anton Paar Modular Compact Rheometer 302 with a plate-plate measuring system. The gap between the 25 mm measuring plate was set to 0.100 mm and a home-built solvent trap, made of a Teflon-ring and silicon oil, was put around the measuring system to prevent evaporation of water. The measuring system was heated by a Peltier element and features a glass plate on the bottom to allow *in-situ* irradiation (Figure S9). The storage modulus  $G'$  and loss modulus  $G''$  were measured in oscillation mode. Amplitude sweeps were acquired with a frequency of  $f = 1$  Hz as a function of the strain ( $\gamma = 0.1 - 1000$  %). All remaining measurements were carried out with a strain amplitude of  $\gamma = 1$  % (in the linear viscoelastic region).

## Synthesis

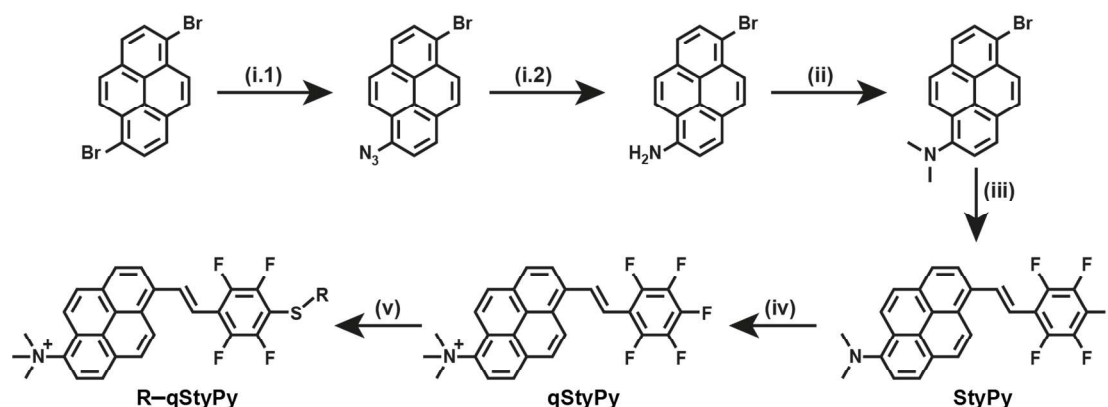

**Figure S1: Synthesis and functionalization of qStyPy.** Reaction conditions: (i) 1.)  $\text{NaN}_3$ ,  $\text{CuI}$ ,  $N,N'$ -dimethyl-ethylenediamine, sodium ascorbate,  $\text{N}_2$ ; 2.)  $\text{NaSH} \cdot x \text{H}_2\text{O}$ , 38 %; (ii)  $\text{MeI}$ ,  $\text{K}_2\text{CO}_3$ ,  $\text{N}_2$ , 100 %; (iii) pentafluorostyrene,  $\text{Pd}(\text{OAc})_2$ ,  $\text{NEt}_3$ ,  $\text{K}_2\text{CO}_3$ ,  $\text{N}_2$ , 62 %, (iv)  $\text{MeOTf}$ , 92 %, (v)  $\text{R-SH}$ ,  $\text{DBU}$ , > 90 %.

## Synthesis of 1-amino-6-bromopyrene

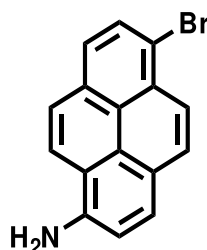

1,6-Dibromo-pyrene (1.00 g, 2.80 mmol, 1.00 eq.),  $\text{CuI}$  (56.1 mg, 0.295 mmol, 10.5 mol-%) and sodium ascorbate (33.4 mg, 0.169 mmol, 6.0 mol-%) were dispersed in THF (70 mL) and nitrogen-purged (15 min).  $N,N'$ -dimethylethylenediamine (DMEDA, 38.5 mg, 0.437 mmol, 15.6 mol %) dissolved in THF (10 mL) was added to the reaction mixture. Subsequently,  $\text{NaN}_3$  (195 mg, 3.00 mmol, 1.07 eq.) dissolved in water (7 mL) was added dropwise and

the reaction mixture was refluxed for 15 hours. THF was removed *in vacuo* and the residue was washed twice with water (2 x 30 mL). The aqueous phase was removed *via* centrifugation and subsequently, by lyophilization yielding 928 mg raw product. The raw product was dissolved in THF (95 mL) and mixed with NaSH · H<sub>2</sub>O (2.97 g, 40.1 mmol, 13.8 eq.) dissolved in water (9.5 mL). The red solution was refluxed for 3 hours. Subsequently, it was cooled to RT and mixed with chloroform (40 mL) and water (40 mL) and the aqueous phase was extracted twice with chloroform (2 x 40 mL). The combined organic phases were dried *in vacuo* and the residue was purified by flash column chromatography (SiO<sub>2</sub>) using pure DCM as the eluent. Yield: 312 mg (37.6 %). <sup>1</sup>H-NMR (CDCl<sub>3</sub>, 400 MHz, 25 °C): δ = 8.16 (dd, *J* = 8.7, 5.5 Hz, 2H), 8.02 (dd, *J* = 8.7, 6.2 Hz, 2H), 7.95 (q, *J* = 9.2 Hz, 2H), 7.87 (d, *J* = 8.2 Hz, 1H), 7.40 (d, *J* = 8.2 Hz, 1H), 4.56 (s, 2H) ppm. <sup>13</sup>C-NMR (CDCl<sub>3</sub>, 101 MHz, 25 °C) δ = 141.78, 131.29, 130.75, 130.29, 129.37, 126.88, 125.81, 125.55, 124.12, 122.38, 120.55, 118.89, 116.84, 114.67 ppm.

### Synthesis of 6-bromo-1-(dimethylamino)pyrene

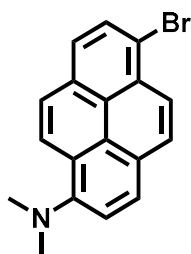

1-Amino-6-bromopyrene (293 mg, 0.991 mmol) and K<sub>2</sub>CO<sub>3</sub> (702 mg, 5.08 mmol, 5.1 eq.) were dispersed in DMF (11 mL), nitrogen-purged (15 min) and subsequently mixed with iodomethane (350 μL, 798 mg, 5.62 mmol, 5.7 eq.). The reaction mixture was heated to 120 °C and stirred for one hour. Afterwards, it was cooled to RT, quenched with water (20 mL), and the aqueous phase was extracted with DCM (40 mL). Removing the solvent *in vacuo* yielded the product quantitatively. Yield: 321 mg (99.9 %). <sup>1</sup>H-NMR (CDCl<sub>3</sub>, 400 MHz, 25 °C) δ = 8.47 (d, *J* = 9.3 Hz, 1H), 8.27 (d, *J* = 9.2 Hz, 1H), 8.18 (d, *J* = 8.2 Hz, 1H), 8.13 (dd, *J* = 8.3, 1.3 Hz, 1H), 8.06 (dd, *J* = 9.1, 1.3 Hz, 1H), 8.00 (d, *J* = 9.2 Hz, 1H), 7.94 (dd, *J* = 8.2, 1.3 Hz, 1H), 7.76 (dd, *J* = 8.2, 0.9 Hz, 1H), 3.06 (s, 6H) ppm. <sup>13</sup>C-NMR (CDCl<sub>3</sub>, 101 MHz, 25 °C) δ = 149.80, 130.93, 130.22, 129.10, 126.81, 126.57, 126.04, 125.52, 124.91, 124.49, 124.08, 123.96, 119.24, 117.18, 45.80 ppm. LC-MS calculated [C<sub>18</sub>H<sub>14</sub>BrN<sup>+</sup>]: 323.0304 g·mol<sup>-1</sup>, found [C<sub>18</sub>H<sub>14</sub>BrN<sup>+</sup>]: 323.0302 g·mol<sup>-1</sup>.

### Synthesis of 1-dimethylamino-6-pentafluorostyryl-pyrene (StyPy)

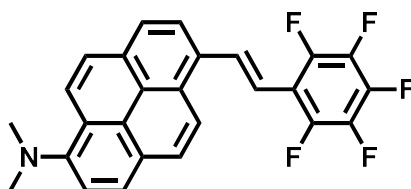

6-Bromo-1-(dimethylamino)pyrene (321 mg, 0.9898 mmol), Pd(OAc)<sub>2</sub> (11.6 mg, 0.0517 mmol, 5.2 mol-%) and PPh<sub>3</sub> (61.6 mg, 0.235 mmol, 24 mol-%) were dissolved in DMF (20 mL) and nitrogen-purged (10 min). The solution was mixed with K<sub>2</sub>CO<sub>3</sub> (144 mg, 1.04 mmol, 1.1 eq.), NEt<sub>3</sub> (1.5 mL, 10.8 mmol, 10.9 eq.) and pentafluorostyrene (550 μL, 773 mg, 3.98 mmol, 4.0 eq.). The reaction mixture was heated to 110 °C and stirred for 48 h in a sealed Schlenk flask to the exclusion of light and air. Subsequently, it was mixed with water (40 mL) and the aqueous phase was extracted with chloroform (3 x 100 mL). The combined organic phases were removed *in vacuo* and

the raw product was purified *via* flash column chromatography (SiO<sub>2</sub>) using DCM as the eluent. Remaining impurities were removed by recrystallization from acetone yielding the product as a yellow powder. Yield: 270 mg (62.3 %). <sup>1</sup>H-NMR (CDCl<sub>3</sub>, 400 MHz, 25 °C)  $\delta$  = 8.52 (d, *J* = 16.4 Hz, 2H), 8.27 (t, *J* = 9.4 Hz, 2H), 8.14 (d, *J* = 8.2 Hz, 2H), 8.07 (d, *J* = 9.2 Hz, 2H), 7.77 (d, *J* = 8.2 Hz, 1H), 7.19 (d, *J* = 16.5 Hz, 1H), 3.09 (s, 6H) ppm. <sup>19</sup>F-NMR (CDCl<sub>3</sub>, 377 MHz, 25 °C)  $\delta$  = -142.71 (dd, *J* = 21.7, 7.7 Hz, 2F), -156.55 (m, 1F), -162.83 (td, *J* = 21.3, 7.6 Hz, 2F) ppm. <sup>13</sup>C-NMR (CDCl<sub>3</sub>, 101 MHz, 25 °C)  $\delta$  = 128.39, 126.05, 116.92, 45.93 ppm. ESI-MS: calculated [C<sub>26</sub>H<sub>17</sub>F<sub>5</sub>N<sup>+</sup>]: 438.1276 g·mol<sup>-1</sup>, found [C<sub>26</sub>H<sub>17</sub>F<sub>5</sub>N<sup>+</sup>]: 438.1279 g·mol<sup>-1</sup>.

### Synthesis of 1-trimethylammonium-6-pentafluorostyryl-pyrene triflate (qStyPy)

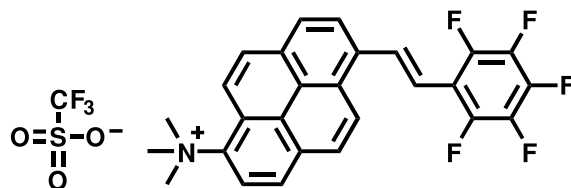

StyPy (20.6 mg, 47.1  $\mu$ mol) was dispersed in chloroform (3.0 mL) and mixed with MeOTf (21.4  $\mu$ L, 31.0 mg, 189  $\mu$ mol, 4.0 eq.) at RT. The dispersion was heated to 60 °C, so that StyPy fully dissolved. The yellow solution was stirred at 60 °C for 20 h. During the reaction, a pale-yellow precipitate formed. The solution was cooled to 0 °C and the precipitate was collected *via* centrifugation (10,000 RPM, 2 min) and washed with chloroform (3.0 mL). Drying *in vacuo* yielded the quaternized StyPy (qStyPy). Yield: 25.9 mg (91.5 %). <sup>1</sup>H-NMR (Acetone-*d*<sub>6</sub>, 400 MHz, 25 °C)  $\delta$  = 9.04 (d, *J* = 9.6 Hz, 1H), 8.81 (d, *J* = 8.9 Hz, 1H), 8.73 (d, *J* = 9.3 Hz, 1H), 8.66 (d, *J* = 3.8 Hz, 1H), 8.56 (m, 4H), 8.40 (d, *J* = 9.3 Hz, 1H), 7.41 (d, *J* = 16.5 Hz, 1H), 4.41 (s, 9H) ppm. <sup>13</sup>C-NMR (Acetone-*d*<sub>6</sub>, 101 MHz, 25 °C)  $\delta$  = 130.13, 130.05, 128.70, 127.78, 127.29, 126.57, 125.64, 125.29, 124.98, 123.22, 121.67, 119.13, 116.99, 58.45 ppm. <sup>19</sup>F-NMR (Acetone-*d*<sub>6</sub>, 377 MHz, 25 °C)  $\delta$  = -78.84 (s, 3F), -143.60 (m, 2F), -157.83 (m, 1F), -164.78 (d, *J* = 7.3 Hz, 2F) ppm. LC-MS: calculated [C<sub>27</sub>H<sub>19</sub>F<sub>5</sub>N<sup>+</sup>]: 452.1432 g·mol<sup>-1</sup>, found [C<sub>27</sub>H<sub>19</sub>F<sub>5</sub>N<sup>+</sup>]: 452.1433 g·mol<sup>-1</sup>.

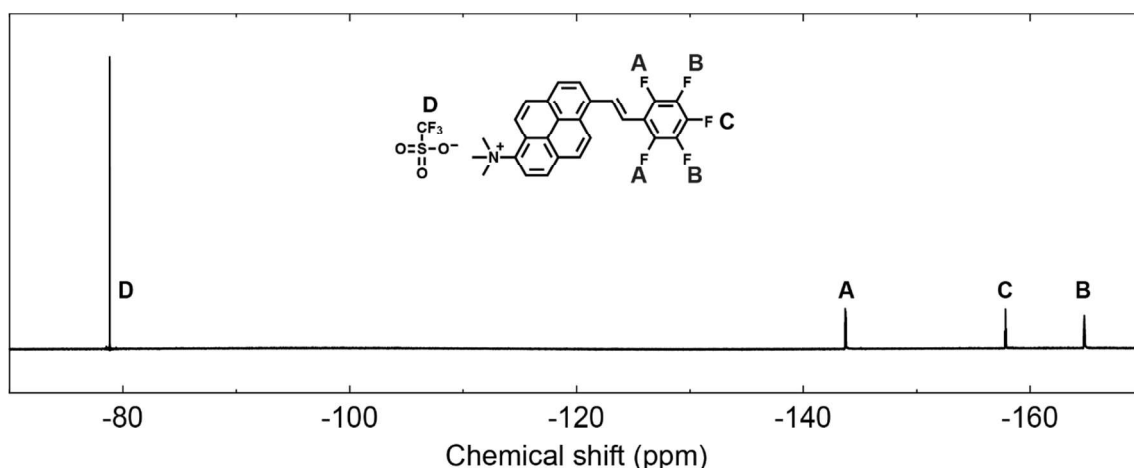

Figure S2: <sup>19</sup>F-NMR spectrum of qStyPy in acetone-*d*<sub>6</sub>. The signals are assigned to the fluorine atoms.

## Synthesis of *m*PEG<sub>44</sub>-qStyPy

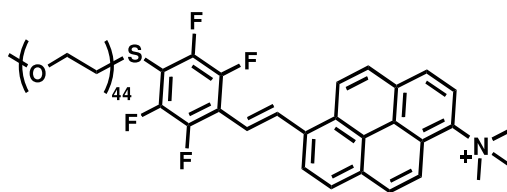

qStyPy (2.89 mg, 4.8  $\mu\text{mol}$ ) was transferred into a vial and mixed with a stock solution of *m*PEG<sub>44</sub>-SH (192.2  $\mu\text{L}$ , 50  $\text{mg}\cdot\text{mL}^{-1}$ , 1.0 eq.) dissolved in acetone. The addition of DBU (1.5 mg, 2.1  $\mu\text{L}$ , 10  $\mu\text{mol}$ , 2.1 eq.) instantly changed the color to deep orange. The solution was stirred for 30 min at 60  $^{\circ}\text{C}$ , cooled to RT and precipitated in cold Et<sub>2</sub>O (-6  $^{\circ}\text{C}$ ). The precipitate was collected *via* centrifugation, washed with Et<sub>2</sub>O (-6  $^{\circ}\text{C}$ ) and dissolved in H<sub>2</sub>O. Freeze-drying overnight yielded the desired product as an orange powder. Yield: 11.2 mg (90.1 %). <sup>19</sup>F-NMR (Acetone-*d*<sub>6</sub>, 377 MHz, 25  $^{\circ}\text{C}$ )  $\delta$  = -136.49 (ddd,  $J$  = 73.9, 23.0, 11.6 Hz), -144.29 (m) ppm. ESI-MS: calculated [C<sub>116</sub>H<sub>200</sub>F<sub>4</sub>NO<sub>44</sub>Na<sup>2+</sup>]: 1176.6170  $\text{g}\cdot\text{mol}^{-1}$ , found [C<sub>116</sub>H<sub>200</sub>F<sub>4</sub>NO<sub>44</sub>Na<sup>2+</sup>]: 1176.6167  $\text{g}\cdot\text{mol}^{-1}$ .

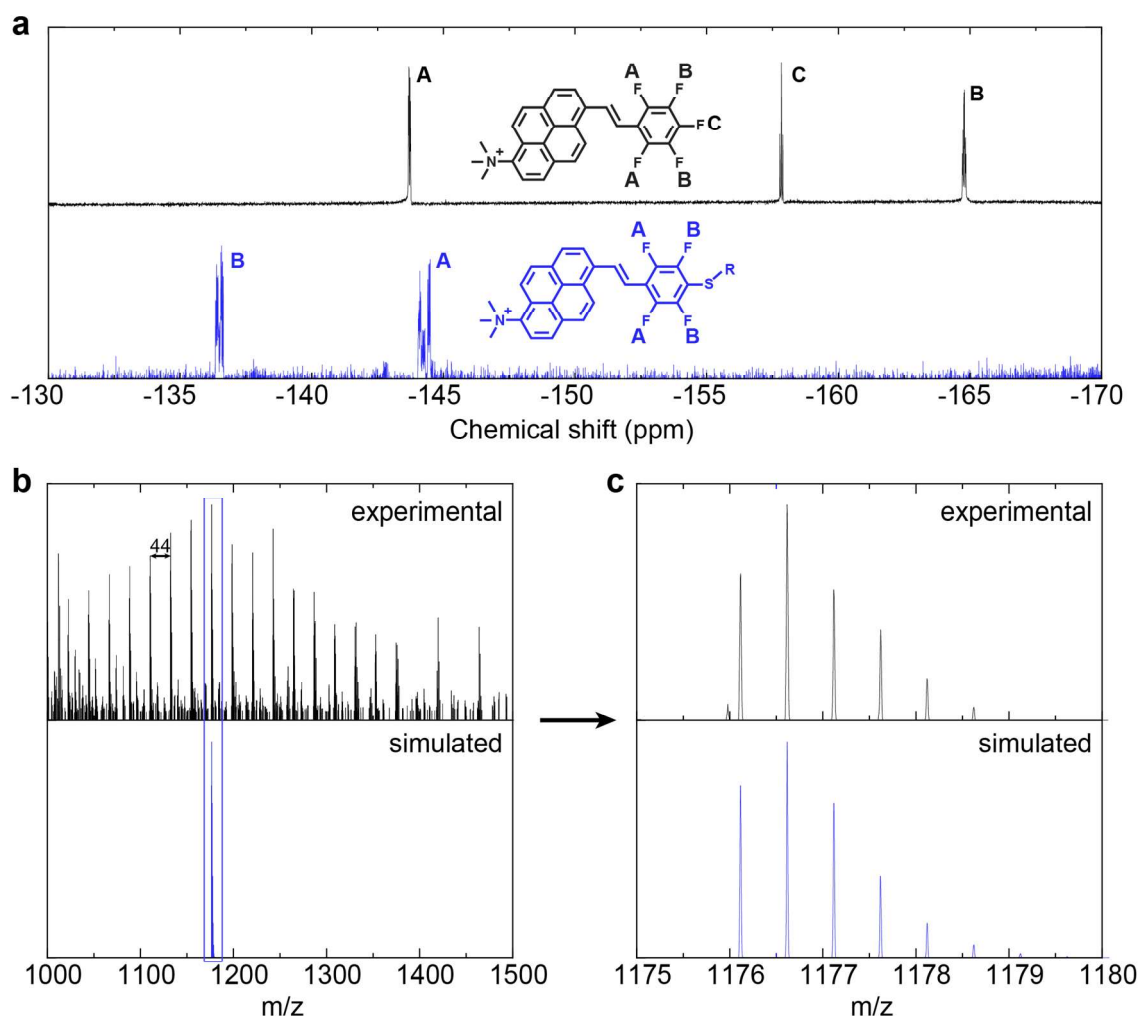

**Figure S3: Characterization of *m*PEG<sub>44</sub>-qStyPy.** (a) <sup>19</sup>F-NMR spectra before (top) and after (bottom) the PFTR in acetone-*d*<sub>6</sub>. The signals are assigned to the fluorine atoms. (b) Experimental (top) and simulated (bottom) mass spectra of *m*PEG<sub>44</sub>-qStyPy. (c) The close-ups of b (highlighted by a blue rectangle) show the isotopic patterns.

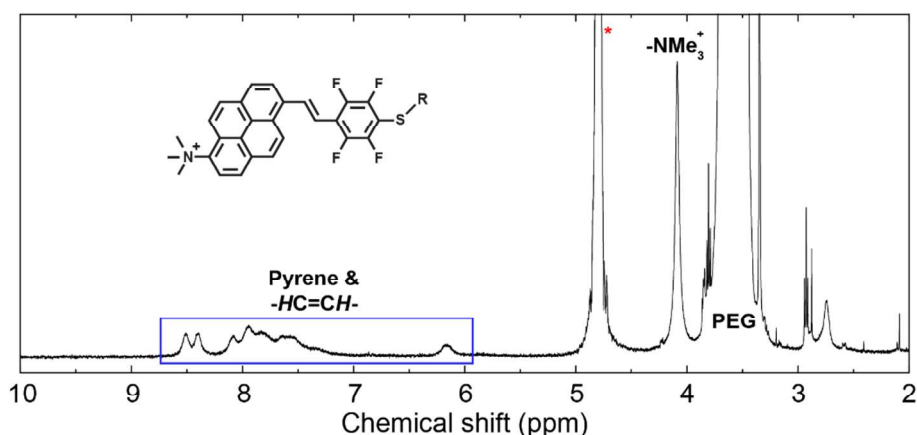

**Figure S4:**  $^1\text{H}$ -NMR spectrum of  $m\text{PEG}_{44}\text{-qStyPy}$  in  $\text{D}_2\text{O}$ . The peak broadening of the aromatic signals, highlighted by a blue rectangle, indicate the  $\pi$ - $\pi$  interactions between the qStyPy-units in water. The solvent residual is highlighted by a red star. Figure S5 in acetone- $d_6$  shows absence of peak broadening and hence absence of aggregation in good organic solvents.

### Synthesis of sPEG-qStyPy

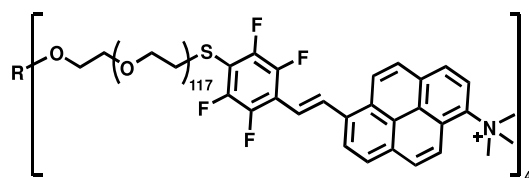

sPEG-SH (19.7 mg, 0.95  $\mu\text{mol}$ ) and qStyPy (2.50 mg, 4.2  $\mu\text{mol}$ , 1.10 eq.) were dispersed in acetone (500  $\mu\text{L}$ ). Upon addition of DBU (1.3 mg, 1.3  $\mu\text{L}$ , 8.7  $\mu\text{mol}$ , 2.3 eq.), the dispersion instantly became deep orange. The reaction mixture was heated to 60  $^\circ\text{C}$  and stirred for 3 h. Subsequently, the solution was cooled to RT and precipitated in cold  $\text{Et}_2\text{O}$  ( $-6\text{ }^\circ\text{C}$ ). The precipitate was collected *via* centrifugation, washed with  $\text{Et}_2\text{O}$  ( $-6\text{ }^\circ\text{C}$ ) and dissolved in  $\text{H}_2\text{O}$ . Freeze-drying overnight yielded the desired product as an orange powder. Yield: 21.3 mg (97.2 %,  $d_f > 98\%$ ).  $^1\text{H}$ -NMR (400 MHz, Acetone- $d_6$ , 25  $^\circ\text{C}$ )  $\delta$  = 9.04 (d,  $J$  = 9.6 Hz, 1H), 8.52 (m, 7H), 7.87 (d,  $J$  = 8.3 Hz, 1H), 7.46 (dd,  $J$  = 46.2, 16.5 Hz, 1H), 4.41 (s, 9H), 3.75 (m, 6H), 3.58 (s, 463H), 3.44 (s, 2H), 3.41 (dd,  $J$  = 5.6, 4.1 Hz, 3H), 3.23 (q,  $J$  = 6.2 Hz, 2H) ppm.  $^{19}\text{F}$ -NMR (Acetone- $d_6$ , 377 MHz, 25  $^\circ\text{C}$ )  $\delta$  = -136.46 (ddd,  $J$  = 76.0, 23.1, 11.5 Hz, 2F), -144.22 (ddd,  $J$  = 144.4, 23.0, 11.4 Hz, 2F) ppm.

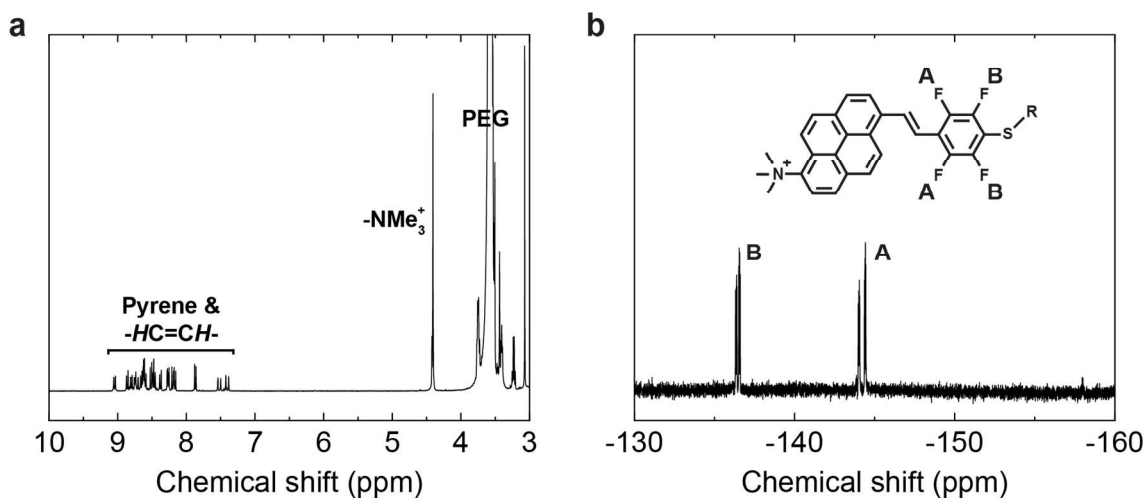

**Figure S5:** NMR spectra of sPEG-qStyPy in acetone- $d_6$ . (a)  $^1\text{H}$ -NMR spectrum. The signals are assigned to the functional groups. (b)  $^{19}\text{F}$ -NMR spectrum. Signals are assigned to the fluorine atoms.

### Overlap concentration of sPEG-OH

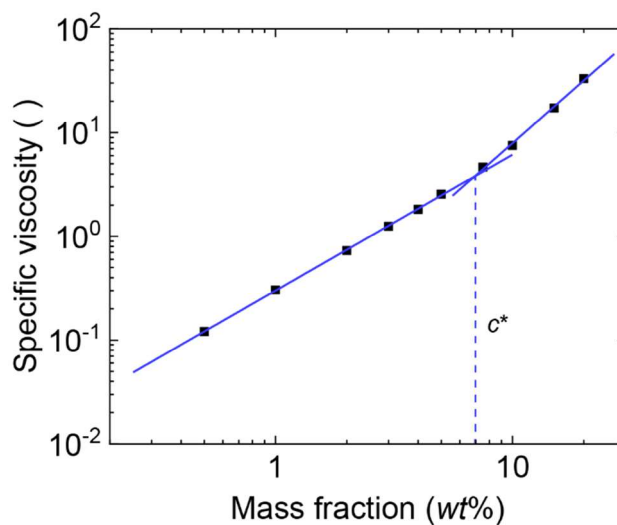

Figure S6: Overlap concentration of sPEG-OH (20 kDa) in water:  $c^* = 6.9 \text{ wt\%}$ .

### Zero-shear viscosity $\eta_0$ of sPEG-qStyPy.

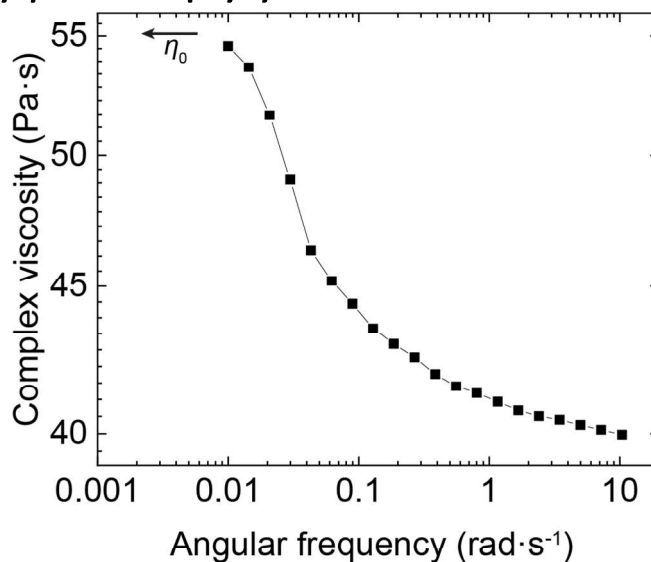

Figure S7: Zero-shear viscosity of sPEG-qStyPy in water (7.0 wt%).  $\eta_0$  is greater than 55 Pa·s.

### Macroscopic phase separation of sPEG-styrylpyrene (22 kDa)

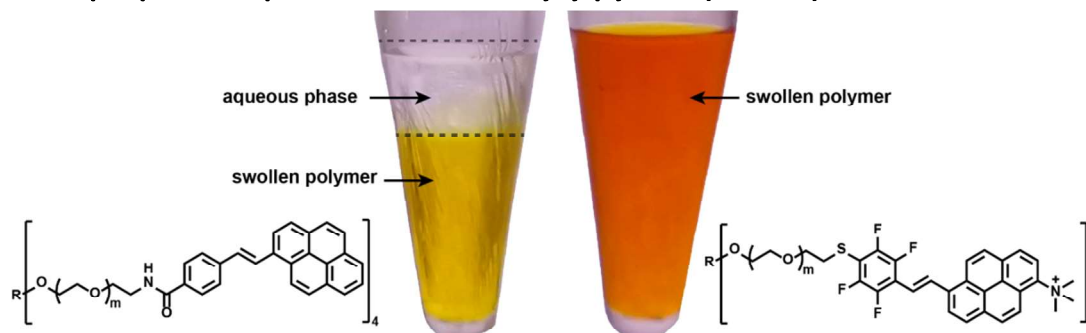

Figure S8: Macroscopic phase separation using the hydrophobic styrylpyrene (left) as opposed to qStyPy (right) at 7.0 wt%.



## Rheology with *in-situ* irradiation

The samples were irradiated with a fiber-coupled LED from Ocean Insight (470 nm).

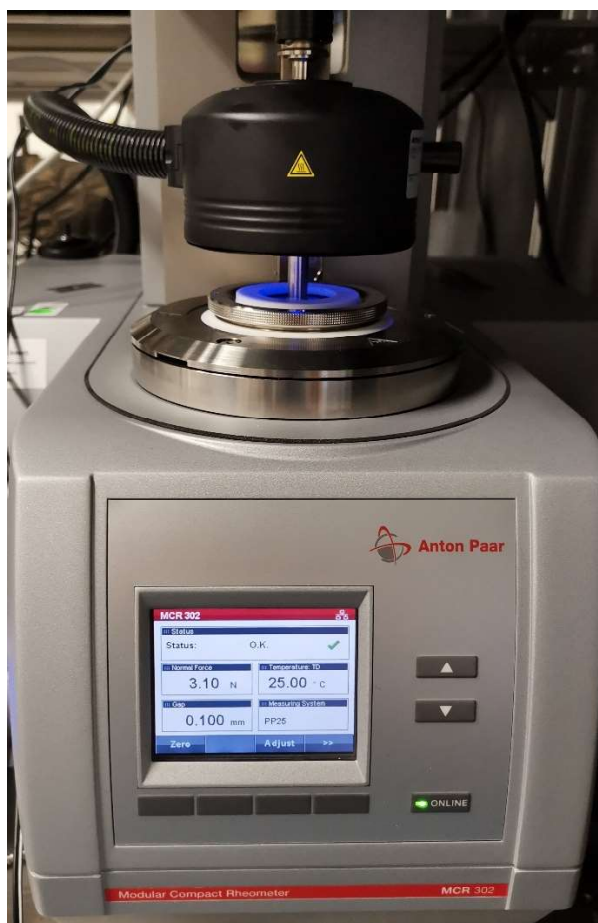

Figure S9: Anton Paar Modular Compact Rheometer 302 with fiber-coupled *in-situ* irradiation.

## UV-Vis spectroscopy

UV-Vis measurements were carried out on an QE Pro from Ocean Insight equipped with the light source DH-2000-BAL and the temperature-controlled cuvette holder qpod 2<sup>TM</sup> from Quantum Northwest. The fiber optic spectroscopy enables to successively acquire UV-Vis spectra in 180° and irradiate samples in 90° (Figure S10). Time-resolved measurements were acquired using self-written MatLab scripts.

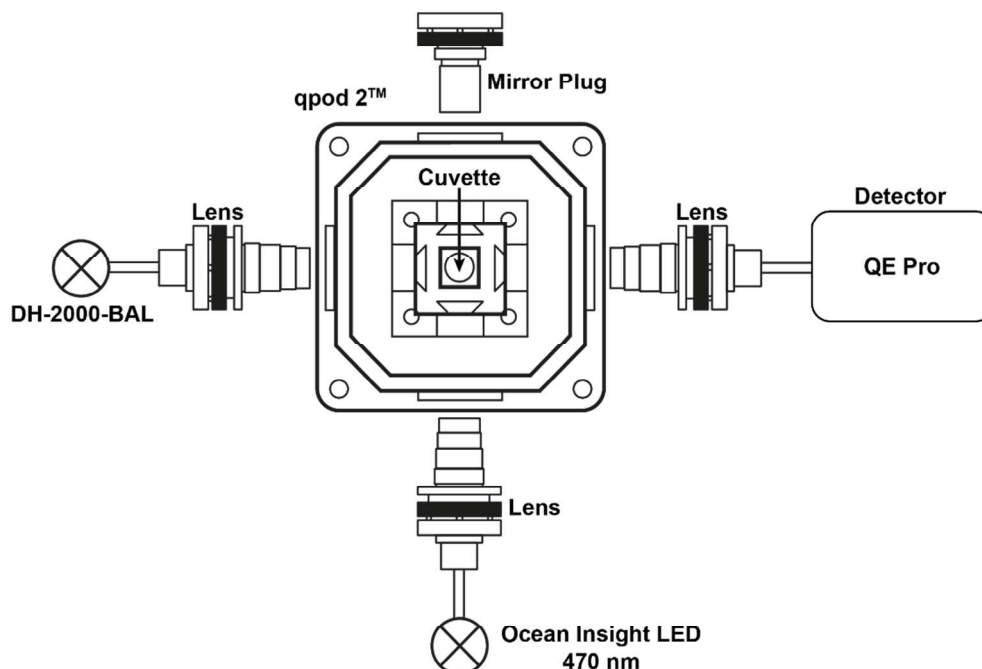

Figure S10: Experimental set-up for successive UV-Vis measurements and sample irradiation.
